# Supplementary material for: A systematic review of conference papers presented at two large Japanese psychology conferences in 2013 and 2018: did Japanese social psychologists selectively report p < 0.05 results without peer review?
Source: PeerJ journal article supplement (doi:10.7717/peerj.16763), 2024-01-18
Supplement: pcurve.pdf [file pcurve.pdf]

## Supplementary 4: P-curve analyses

We pre-registered to conduct  $p$ -curve analyses but decided not to include the results in the paper's main text. It became clear that the  $p$ -curve analyses were redundant since the  $z$ -curve analyses could cover the research questions we originally intended to examine with the  $p$ -curve analyses. Specifically, we planned to test the evidential value of a set of studies using  $p$ -curve analysis. We tested whether the observed  $p$ -value ( $< 0.05$ ) distribution was significantly different from the distribution expected under the null effect. The same test could be performed with greater accuracy by examining whether the 95% confidence interval of the expected replication rate (ERR) estimate from the corresponding  $z$ -curve analysis does not include 5%. Likewise, another analysis plan, the 33% power test that examines whether a set of studies had at least 33% power, can be substituted with  $z$ -curve analysis by looking at whether the 95CI of the ERR included the 33%. Further, whereas we cannot directly compare the 2013 and the 2018 results with  $p$ -curve analysis, it is possible with  $z$ -curve analysis by comparing the ERR in 2013 with that in 2018. Here we report the analysis plan and the results of the pre-registered  $p$ -curve analyses. The results were consistent with the findings of  $z$ -curve analyses.

### Analysis plan

#### *Primary analyses*

With  $p$ -curve analysis, we can test whether a set of studies has evidential value. Specifically, if a set of studies has evidential value, the  $p$ -curve (distribution of reported  $p$ -values smaller than .05) should be right-skewed. Conversely, if the effect in question is null, the  $p$ -curve should show a uniform distribution. Moreover, if researchers resort to  $p$ -hacking to acquire  $p < .05$ , more  $p$ -values will accumulate just under the .05 criterion (e.g.,  $p = .048$ ), leading to a left-skewed  $p$ -curve. Given this logic, the original  $p$ -curve paper was proposed to test the skewness of the full  $p$ -curve (distribution of all  $p$ -values under .05). However, several weaknesses of the original idea have been pointed out (Ulrich & Miller, 2015). For instance, the full  $p$ -curve analysis is vulnerable to “ambitious”  $p$ -hackers who try to have  $p$ -values much smaller than .05 (e.g.,  $p < .03$ ). The “Better  $p$ -curve” has been proposed (Simonsohn et al., 2015) and implemented on the website ([p-curve.com](http://p-curve.com)) to tackle the problem by utilizing the half  $p$ -curve (distribution of  $p$ -values under .025).

We followed the recommendations of the Better  $p$ -curve. First, we tested the right-skewness of the full and half  $p$ -curves. When the half  $p$ -curve test is right-skewed with  $p < .05$ , or when both the full and half  $p$ -curves are right-skewed with  $p < .10$ , we conclude that the set of studies has evidential value. When the right-skewness tests turned out to be non-significant, we proceeded to the 33% power test to see if the  $p$ -curve was flatter than expected if the studies were powered at 33%. As the shape of the  $p$ -curve depends on the power, the  $p$ -curve of studies with 33% power would be fairly flat, albeit right-skewed. If the observed  $p$ -curve is significantly flatter than the 33%  $p$ -curve, we would conclude that the set of studies lacks evidential value. To be precise, following the description on [p-curve.com](http://p-curve.com), we would conclude that “*evidential value is inadequate or absent if the 33% power test is  $p < .05$  for*

*the full p-curve or both the half p-curve and binomial 33% power test are  $p < .1$ .*" Note that the binomial test examines the share of  $p$ -values smaller than .025 among all  $p$ -values under .05).

The  $p$ -values included in the  $p$ -curve analysis should be independent of each other. In addition, the proposed  $p$ -curve analysis strongly recommended re-calculating  $p$ -values from  $p$ -stats (e.g.,  $t$ -values and DFs) rather than relying on  $p$ -values reported in the target articles (Simonsohn et al., 2015).

Therefore, we used the  $p$ -stats first appearing in each conference paper to conduct  $p$ -curve analyses (Fig. S4-1). We used the  $p$ -curve app 4.06, available at [p-curve.com](http://p-curve.com), for the analyses (Simonsohn et al., 2017).

**Figure S4-1: Examples of  $p$ -stats coding format for [p-curve.com](http://p-curve.com)**

|                      |
|----------------------|
| <b>t(88)=2.1</b>     |
| <b>r(147)=.246</b>   |
| <b>F(1,100)=9.1</b>  |
| <b>f(2,210)=4.45</b> |
| <b>Z=3.45</b>        |
| <b>chi2(1)=9.1</b>   |
| <b>r(77)=.47</b>     |
| <b>chi2(2)=8.74</b>  |

***Family-wise error control***

For the  $p$ -curve analysis, we planned to conduct several null hypothesis significance tests. We analyzed the 2013 and 2018 data separately. We conducted several right-skewness tests for each year with different alpha levels. In addition, when these tests do not reach significance, we would proceed to the 33% power tests, including several null hypothesis tests with different alpha levels. As such, controlling for the family-wise error rate is complicated. Therefore, we decided not to declare any family-wise error corrections beforehand. Instead, we reported all tests and raw  $p$ -values from the  $p$ -curve analyses. If the findings are not robust, they should eventually appear in the results (e.g., only a small portion of the tests are significant) ([Lakens, 2020](#)).

***Sensitivity analyses***

Several conference papers have reported more than two  $p$ -stats. We used the  $p$ -stats that appeared last in the papers for the sensitivity analyses<sup>1</sup>. Thus, when there was only one eligible  $p$ -stats in a paper, it was used for the sensitivity analysis. If there were more, we took the last one.

---

<sup>1</sup> We pre-registered to use the second reported  $p$ -stats for the sensitivity analyses. However, it turned out that picking up the last  $p$ -stats required much simpler R-script, making the possibility of errors much smaller. Therefore, we decided to use the last  $p$ -stats for sensitivity analyses.

## Results

### *Primary analyses*

The criterion for evidential value was that either the half  $p$ -curve test was right-skewed with  $p < .05$  or both the half and full tests were right-skewed with  $p < .10$ . These conditions were consistent with the papers in 2013. Both the half  $p$ -curve and full  $p$ -curve were right-skewed with  $p < .0001$  ( $Z = -11.31$  and  $Z = -13.95$ , respectively). In addition, the 33% power test, which would indicate a lack of evidential value when the observed  $p$ -curve was flatter than the 33% power  $p$ -curve, was not significant for either the half  $p$ -curve or the full  $p$ -curve ( $Z = 5.55$ ,  $p > .999$ ;  $Z = 15.09$ ,  $p > .999$ , respectively). Therefore, the  $p$ -curve analysis indicated the presence of an evidential value in 2013 (Fig. S4-2).

Likewise, for papers in 2018, we found that both the half  $p$ -curve and full  $p$ -curve were right-skewed with  $p < .0001$  ( $Z = -13.08$  and  $Z = -15.20$ , respectively). The 33% power test was not significant for either the half  $p$ -curve or the full  $p$ -curve ( $Z = 7.86$ ,  $p > .999$ ;  $Z = 14.40$ ,  $p > .999$ , respectively). Therefore, the evidential value is also indicated in the papers in 2018 (Fig. S4-3). Notably, the  $p$ -curve of the 2018 study appears to be more right-skewed than that of the 2013 study. Right-skewness tests showed larger absolute  $Z$  values for the half  $p$ -curves ( $Z = -11.31$  and  $Z = -13.08$ ) and the full  $p$ -curves ( $Z = -13.95$  and  $Z = -15.20$ ) in 2018 than in 2013.

### *Sensitivity analyses*

We conducted sensitivity analyses with the last  $p$ -stats reported in a paper separately for 2013 and 2018. Sensitivity analyses with the last  $p$ -stats reported in a paper also showed evidential value for the 2013 and 2018 papers. All relevant right-skewness tests were significant, whereas the 33% power tests were not. Therefore, it was shown that the set of studies in 2013 and 2018 had evidential value. Figures S4-4 and S4-5 are copy-and-paste of the outputs produced by  $p$ -curve app 4.06, available at [p-curve.com](http://p-curve.com).

## Conclusion

The  $p$ -curve analysis showed that the set of studies in both years had evidential values. The distributions of  $p$ -values under 5% were significantly right-skewed (Fig. S4-2 to S4-5) and were not significantly flatter than the  $p$ -curve of studies with 33% power in 2013 and 2018. The conference papers presented at the two Japanese psychology societies had, as a whole, certain levels of evidential value. Notably, the  $p$ -curve of the 2018 studies appeared to be more right-skewed than those of the 2013 studies. This suggests that the set of studies in 2018 had a stronger evidential value than those in 2013. These were consistent with findings from the  $z$ -curve analyses reported in the main text.

**Figure S4-2: P-curve of the papers in 2013 produced by p-curve 4.06**

The observed p-curve includes 71 statistically significant ( $p < .05$ ) results, of which 45 are  $p < .025$ . There were 20 additional results entered but excluded from p-curve because they were  $p > .05$ .

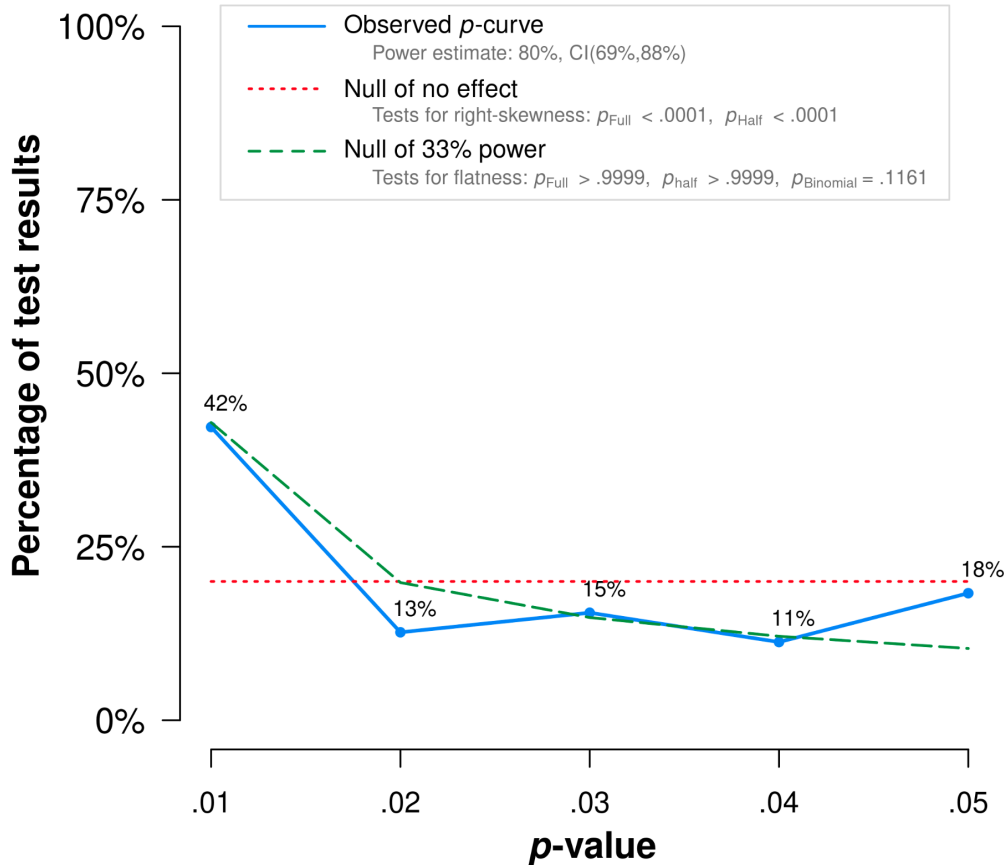

|                                                                                         | Binomial Test                                         | Continuous Test                    |                                     |
|-----------------------------------------------------------------------------------------|-------------------------------------------------------|------------------------------------|-------------------------------------|
|                                                                                         | (Share of results $p < .025$ )                        | Full p-curve<br>( $p$ 's $< .05$ ) | Half p-curve<br>( $p$ 's $< .025$ ) |
| 1) Studies contain evidential value.<br><i>(Right skew)</i>                             | $p = .016$                                            | $Z = -11.31, p < .0001$            | $Z = -13.95, p < .0001$             |
| 2) Studies' evidential value, if any, is inadequate.<br><i>(Flatter than 33% power)</i> | $p = .1161$                                           | $Z = 5.55, p > .9999$              | $Z = 15.09, p > .9999$              |
|                                                                                         | <b>Statistical Power</b>                              |                                    |                                     |
| Power of tests included in p-curve<br><i>(correcting for selective reporting)</i>       | Estimate: 80%<br>90% Confidence interval: (69% , 88%) |                                    |                                     |

**Figure S4-3: P-curve of the papers in 2018 produced by p-curve 4.06**

The observed p-curve includes 42 statistically significant ( $p < .05$ ) results, of which 32 are  $p < .025$ . There were 24 additional results entered but excluded from p-curve because they were  $p > .05$ .

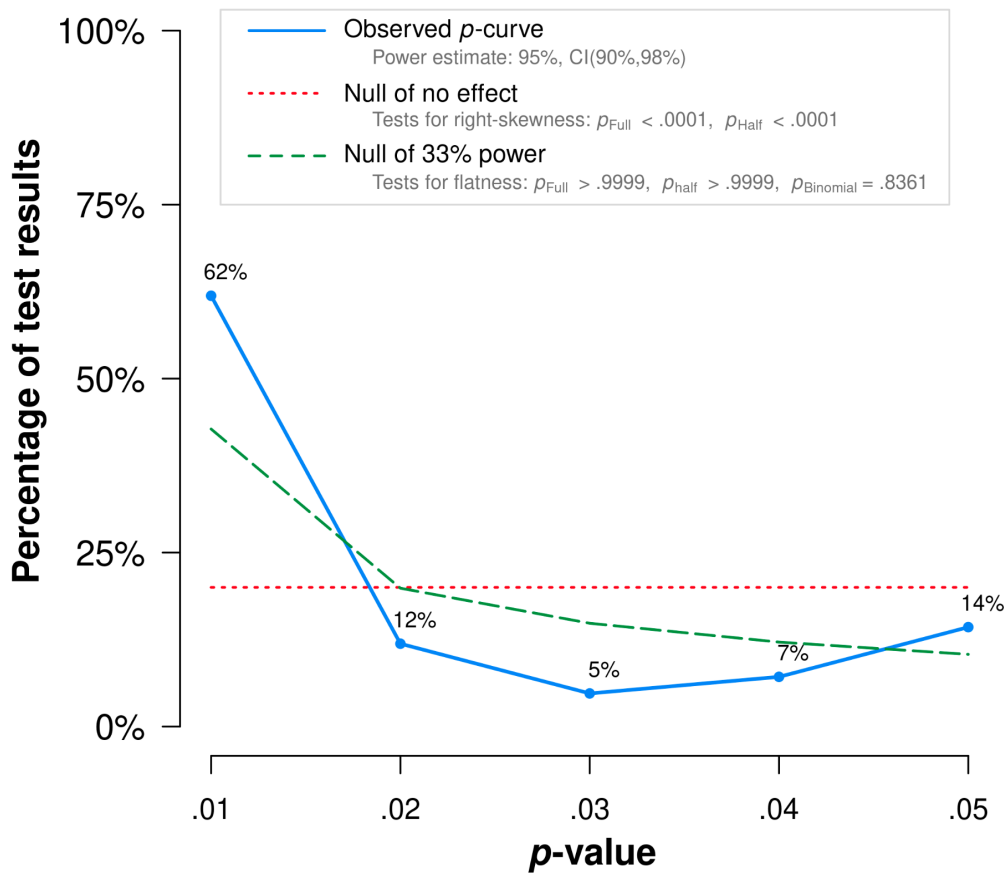

|                                                                                         | Binomial Test                                         | Continuous Test                    |                                     |
|-----------------------------------------------------------------------------------------|-------------------------------------------------------|------------------------------------|-------------------------------------|
|                                                                                         | (Share of results $p < .025$ )                        | Full p-curve<br>( $p$ 's $< .05$ ) | Half p-curve<br>( $p$ 's $< .025$ ) |
| 1) Studies contain evidential value.<br><i>(Right skew)</i>                             | $p = .0005$                                           | $Z = -13.08, p < .0001$            | $Z = -15.2, p < .0001$              |
| 2) Studies' evidential value, if any, is inadequate.<br><i>(Flatter than 33% power)</i> | $p = .8361$                                           | $Z = 7.86, p > .9999$              | $Z = 14.4, p > .9999$               |
|                                                                                         | <b>Statistical Power</b>                              |                                    |                                     |
| Power of tests included in p-curve<br><i>(correcting for selective reporting)</i>       | Estimate: 95%<br>90% Confidence interval: (90% , 98%) |                                    |                                     |

**Figure S4-4. P-curve analysis of 2013 data (sensitivity analysis with last p-stats)**

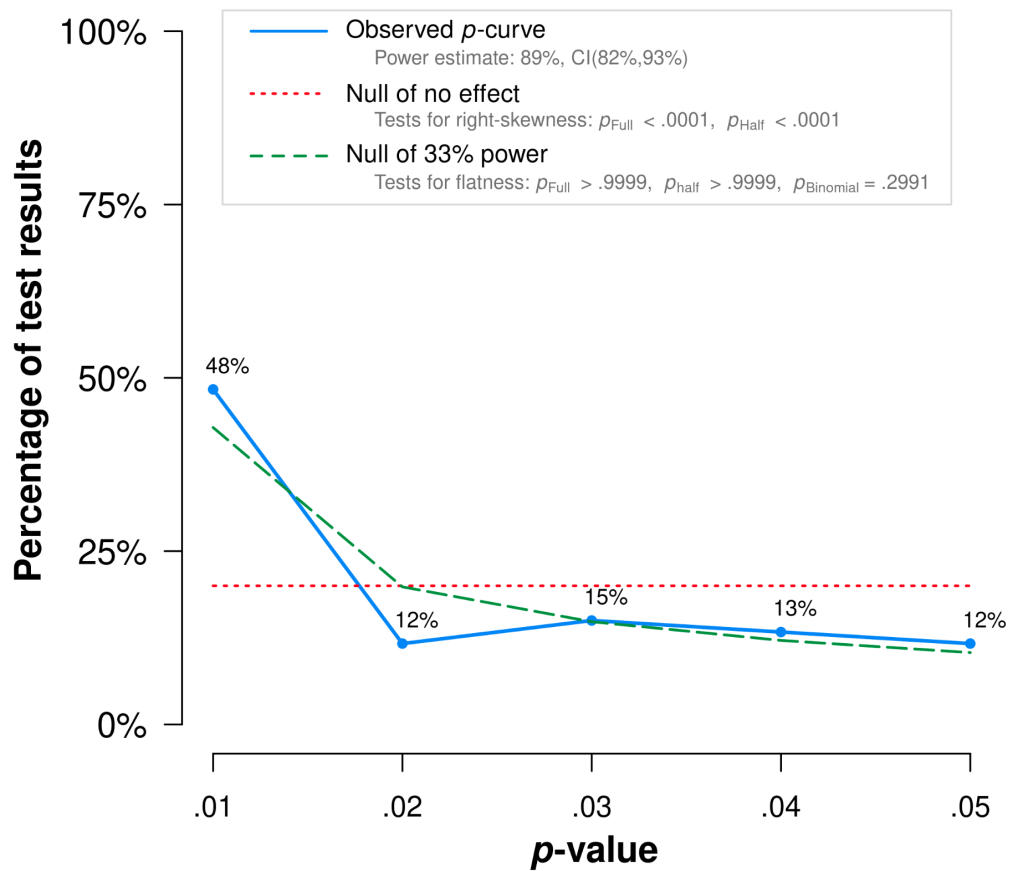

Note: The observed *p*-curve includes 60 statistically significant ( $p < .05$ ) results, of which 40 are  $p < .025$ . There were 28 additional results entered but excluded from *p*-curve because they were  $p > .05$ .

|                                                                                           | Binomial Test                                         | Continuous Test                            |                                             |
|-------------------------------------------------------------------------------------------|-------------------------------------------------------|--------------------------------------------|---------------------------------------------|
|                                                                                           | (Share of results $p < .025$ )                        | (Aggregate with Stouffer Method)           |                                             |
|                                                                                           |                                                       | Full <i>p</i> -curve<br>( $p$ 's $< .05$ ) | Half <i>p</i> -curve<br>( $p$ 's $< .025$ ) |
| 1) Studies contain evidential value.<br><i>(Right skew)</i>                               | $p = .0067$                                           | $Z = -12.9, p < .0001$                     | $Z = -14.99, p < .0001$                     |
| 2) Studies' evidential value, if any, is inadequate.<br><i>(Flatter than 33% power)</i>   | $p = .2991$                                           | $Z = 7.42, p > .9999$                      | $Z = 15.32, p > .9999$                      |
|                                                                                           | <b>Statistical Power</b>                              |                                            |                                             |
| Power of tests included in <i>p</i> -curve<br><i>(correcting for selective reporting)</i> | Estimate: 89%<br>90% Confidence interval: (82% , 93%) |                                            |                                             |

**Figure S4-5. P-curve analysis of 2018 data (sensitivity analysis with last p-stats)**

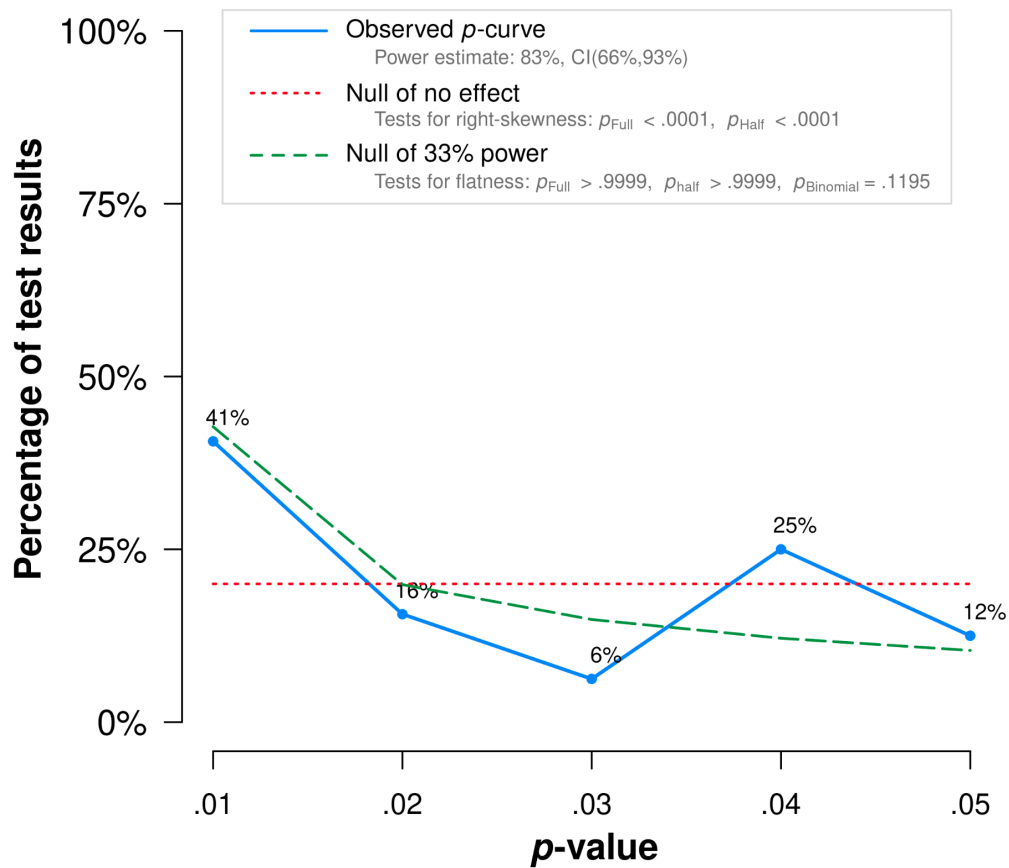

Note: The observed p-curve includes 32 statistically significant ( $p < .05$ ) results, of which 19 are  $p < .025$ . There were 31 additional results entered but excluded from p-curve because they were  $p > .05$ .

|                                                                                         | Binomial Test                                         | Continuous Test                    |                                     |
|-----------------------------------------------------------------------------------------|-------------------------------------------------------|------------------------------------|-------------------------------------|
|                                                                                         | (Share of results $p < .025$ )                        | Full p-curve<br>( $p$ 's $< .05$ ) | Half p-curve<br>( $p$ 's $< .025$ ) |
| 1) Studies contain evidential value.<br><i>(Right skew)</i>                             | $p = .1885$                                           | $Z = 7.89, p < .0001$              | $Z = 10.52, p < .0001$              |
| 2) Studies' evidential value, if any, is inadequate.<br><i>(Flatter than 33% power)</i> | $p = .1195$                                           | $Z = 3.74, p = .9999$              | $Z = 10.49, p > .9999$              |
| <b>Statistical Power</b>                                                                |                                                       |                                    |                                     |
| Power of tests included in p-curve<br><i>(correcting for selective reporting)</i>       | Estimate: 83%<br>90% Confidence interval: (66% , 93%) |                                    |                                     |

## References

- Lakens, D. (2020, March 12). What's a family in family-wise error control?  
<http://daniellakens.blogspot.com/2020/03/whats-family-in-family-wise-error.html>
- Simonsohn, U., Nelson, L. D., & Simmons, J. P. (2014a). P-curve: A key to the file-drawer. *Journal of Experimental Psychology. General*, *143*(2), 534–547.  
<https://doi.org/10.1037/a0033242>
- Simonsohn, U., Nelson, L. D., & Simmons, J. P. (2014b). p-Curve and Effect Size: Correcting for Publication Bias Using Only Significant Results. *Perspectives on Psychological Science: A Journal of the Association for Psychological Science*, *9*(6), 666–681.  
<https://doi.org/10.1177/1745691614553988>
- Simonsohn, U., Nelson, L. D., & Simmons, J. P. (2017, November 30). *The p-curve app 4.06*. P-Curve.com. <http://www.p-curve.com/app4/>
- Simonsohn, U., Simmons, J. P., & Nelson, L. D. (2015). Better P-curves: Making P-curve analysis more robust to errors, fraud, and ambitious P-hacking, a Reply to Ulrich and Miller (2015). *Journal of Experimental Psychology. General*, *144*(6), 1146–1152.  
<https://doi.org/10.1037/xge0000104>
- Ulrich, R., & Miller, J. (2015). *p*-hacking by post hoc selection with multiple opportunities: Detectability by skewness test?: Comment on Simonsohn, Nelson, and Simmons (2014). *Journal of Experimental Psychology. General*, *144*(6), 1137–1145.  
<https://doi.org/10.1037/xge0000086>
