# Supplementary material for: A systematic review of conference papers presented at two large Japanese psychology conferences in 2013 and 2018: did Japanese social psychologists selectively report p < 0.05 results without peer review?
Source: PeerJ. 2024 Jan 18;12:e16763. doi: 10.7717/peerj.16763 (PMC10800096; doi:10.7717/peerj.16763)
Supplement: Supplemental Information 6 — Lists of included studies for 2013 conference papers and 2018 conference papers. Studies with p-stats or p-values were included. Only those studies with p-stats were used for the p-curve analyses. All included studies were used for the z-curve analyses. Links to each study at the society archive are presented where one can find the PDF file of the conference paper (mostly in Japanese). [file peerj-12-16763-s006.xlsx]

## Sheet: 2013_included_studies
Research.ID	P-stats	N	n	p_info	pval	sig	es_type	gr_mean_info	gr_var_info	gr_mean_plot	gr_var_plot	Authors	Title	Conference	Poster/Oral	URL	d
1AM-010	t(95)=2.11	present	present	alpha level	NA	significant		present	SD	absent	absent	森 津太子	裁判員の量刑判断におけるアンカリング効果-無関連な係留値の影響-	JPA	Poster	https://doi.org/10.4992/pacjpa.77.0_1AM-010
1AM-018	F(1,86)=31.46	present	absent	alpha level	NA	significant	ita^2 (partial ita^2)	absent	absent	present	SE	川上 直秋, 吉田 富二雄	無意識のストーリー認知-閾下刺激の系列呈示による検討-	JPA	Poster	https://doi.org/10.4992/pacjpa.77.0_1AM-018
1AM-022	F(1,105)=11.13	present	absent	alpha level	NA	significant	ita^2 (partial ita^2)	present	SD	absent	absent	上原 俊介， 中川 知宏， 田村 達， 小形 佳祐， 齋藤 五大	怒りと道徳的違反の知覚-危害の正当性と義憤および私憤に対するその影響-	JPA	Poster	https://doi.org/10.4992/pacjpa.77.0_1AM-022
1EV-012	F(1,239)=15.24	present	absent	alpha level	NA	significant		present	absent	absent	absent	福野 光輝, 森 和彦	姿勢としての努力が報酬分配におよぼす効果	JPA	Poster	https://doi.org/10.4992/pacjpa.77.0_1EV-012
1EV-015	F(1,117)=4.659	present	absent	p-value	0.011	significant	ita^2 (partial ita^2)	present	SE	present	unknown	應治 麻美, 唐沢 穣	内集団の記述的規範の推測による行動意図の促進	JPA	Poster	https://doi.org/10.4992/pacjpa.77.0_1EV-015
2AM-040	F(7,143)=2.17	present	present	alpha level	NA	significant	R^2 (adj. R^2)	absent	absent	present	absent	山本 真菜, 岡 隆	認知的複雑性とステレオタイプ抑制による逆説的効果との関係	JPA	Poster	https://doi.org/10.4992/pacjpa.77.0_2AM-040
2AM-043	F(1,257)=8.66	present	present	p-value	0.004	significant	ita^2 (partial ita^2)	absent	absent	present	absent	宮崎 弦太, 矢田 尚也, 池上 知子	関係流動性と親密な二者関係における交換不安	JPA	Poster	https://doi.org/10.4992/pacjpa.77.0_2AM-043
2AM-046	t(37)=2.73	present	absent	alpha level	NA	significant	B(reg)	absent	absent	present	absent	中島 健一郎	今が良いからこそ心が痛む ：集団アイデンティティがfuture alone操作後の痛み関連反応に及ぼす影響	JPA	Poster	https://doi.org/10.4992/pacjpa.77.0_2AM-046
2AM-049	F(2,33)=4.36	present	absent	alpha level	NA	significant		absent	absent	present	absent	佐野 予理子, 黒石 憲洋	「ふつう」であることの安心感(13)：高校生の場合	JPA	Poster	https://doi.org/10.4992/pacjpa.77.0_2AM-049
2EV-006	F(2,72)=31.17	present	absent	alpha level	NA	significant	ita^2 (partial ita^2)	absent	absent	present	absent	山本 恭子	競争者間の関係性が勝敗に伴う表情表出に及ぼす影響	JPA	Poster	https://doi.org/10.4992/pacjpa.77.0_2EV-006
2EV-012	F(1,24)=5.12	present	absent	alpha level	NA	significant		present	SD	present	absent	小林 智之, 及川 昌典	メタステレオタイプが集団間相互作用へ及ぼす影響	JPA	Poster	https://doi.org/10.4992/pacjpa.77.0_2EV-012
2EV-025	F(1,47)=4.17	present	absent	alpha level	NA	significant		absent	absent	present	unknown	波多野 純	介護場面での高齢者の肉体の露出が非人間化に及ぼす影響	JPA	Poster	https://doi.org/10.4992/pacjpa.77.0_2EV-025
3AM-010	F(3,56)=2.607	present	absent	alpha level	NA	marginally sig		absent	absent	present	absent	神田 光栄, 坂井 信之	香りによる人物の印象が瞳孔径の変化に及ぼす影響	JPA	Poster	https://doi.org/10.4992/pacjpa.77.0_3AM-010
3AM-025	chi2(2)=15.31	absent	absent	alpha level	NA	significant		present	absent	absent	absent	風間 文明, 前田 美希	子どもによるメッセージの説得効果	JPA	Poster	https://doi.org/10.4992/pacjpa.77.0_3AM-025
3AM-027	F(2,91)=3.79	present	present	alpha level	NA	significant		absent	absent	absent	absent	津田恭充	値引き前と値引き後の価格のどちらを強調するのが有効か？	JPA	Poster	(presentation at the venue canceled)
3AM-035	t(7)=4.88	present	present	alpha level	NA	significant		absent	absent	present	absent	中嶋 智史, 間山 広江, 請園 正敏, 髙橋 伸彰, 高野 裕治	ラットの社会的再認における前頭前野損傷の影響-実験室ラットにおける社会神経科学の試み（２）-	JPA	Poster	https://doi.org/10.4992/pacjpa.77.0_3AM-035
3PM-003	F(1,17)=4.70	present	absent	alpha level	NA	significant		absent	absent	present	unknown	千葉 元気, 都築 誉史, 相馬 正史	動機づけによる食品成分表示への視覚的注意の変化	JPA	Poster	https://doi.org/10.4992/pacjpa.77.0_3PM-003
3PM-025	chi2(1)=5.41	present	absent	alpha level	NA	significant		present	absent	absent	absent	鈴木 修司	魅力効果に及ぼす時間的距離の影響	JPA	Poster	https://doi.org/10.4992/pacjpa.77.0_3PM-025
A-0006	F(2,60)=3.18	present	present	alpha level	NA	significant		absent	absent	absent	absent	藤枝 静暁, 相川 充	小学生の感謝スキルの習得を目標としたソーシャルスキル教育の効果に関する実験的検討(2)－児童による仲間評定と教師による児童評定の分析－	JSSP	Poster	https://iap-jp.org/jssp/conf_archive/detail.php?s=2013-A-0006
A-0019	F(2,30)=5.09	present	present	alpha level	NA	significant		present	SD	present	absent	黒石 憲洋, 佐野 予理子	「ふつう」であることの安心感（16）：高校生の場合	JSSP	Poster	https://iap-jp.org/jssp/conf_archive/detail.php?s=2013-A-0019
A-0047	F(1,246)=3.54	present	present	alpha level	NA	marginally sig		absent	absent	present	absent	宮本 聡介, 菅 さやか, 太幡 直也	説明経験が説明対象の実在性認知に与える影響：架空の心理用語を用いて	JSSP	Poster	https://iap-jp.org/jssp/conf_archive/detail.php?s=2013-A-0047
A-0053	F(1,140)=4.10	present	present	alpha level	NA	significant		present	SD	absent	absent	太幡 直也, 菅 さやか, 宮本 聡介	ウソだと認識できる事柄に対する説明経験が 説明対象の実在性認知に与える影響	JSSP	Poster	https://iap-jp.org/jssp/conf_archive/detail.php?s=2013-A-0053
A-0069	F(1,53)=21.8	present	present	alpha level	NA	significant		absent	absent	present	absent	富永 仁志, 内田 由紀子	集合的非達成は包括的認知を促進するか？～共同演奏作業を通しての検証～	JSSP	Oral	https://iap-jp.org/jssp/conf_archive/detail.php?s=2013-A-0069
A-0071	F(2,141)=14.71	present	absent	alpha level	NA	significant		absent	absent	present	absent	佐野 予理子, 黒石 憲洋	「ふつう」であることの安心感（15）：中学生の場合	JSSP	Poster	https://iap-jp.org/jssp/conf_archive/detail.php?s=2013-A-0071
A-0073	t(18)=-1.73	present	absent	p-value	0.1	marginally sig		absent	absent	absent	absent	有吉 美恵, 山口 裕幸	初対面の大学生における2者・4者間の適応感比較	JSSP	Poster	https://iap-jp.org/jssp/conf_archive/detail.php?s=2013-A-0073
A-0088	F(2,48)=5.83	present	present	p-value	0.005	significant	ita^2 (partial ita^2)	absent	absent	present	unknown	日道 俊之, 藤田 弥世, 野村 理朗	他者の心的状態の推測に対するオキシトシン受容体遺伝子多型及び心的ストレスの影響	JSSP	Oral	https://iap-jp.org/jssp/conf_archive/detail.php?s=2013-A-0088
A-0090	F(3,186)=19.25	present	present	absent	NA	significant		present	SD	absent	absent	大薗 博記	異性の最後通告ゲームの行動が性的魅力に及ぼす影響	JSSP	Poster	https://iap-jp.org/jssp/conf_archive/detail.php?s=2013-A-0090
A-0097	t(10)=2.30	present	present	p-value	0.044	significant		absent	absent	present	unknown	坪井 翔, 黒島 妃香, 藤田 和生	資源がフサオマキザルの警戒行動に与える影響	JSSP	Poster	https://iap-jp.org/jssp/conf_archive/detail.php?s=2013-A-0097
A-0098	F(2,110)=6.61	present	present	alpha level	NA	significant	ita^2 (partial ita^2)	present	absent	absent	absent	脇本 竜太郎	逸脱行為の意図が内在的正義の推論に及ぼす影響：自己効力感の調節効果	JSSP	Poster	https://iap-jp.org/jssp/conf_archive/detail.php?s=2013-A-0098
A-0101	F(1,115)=4.17	present	absent	alpha level	NA	significant	ita^2 (partial ita^2)	absent	absent	present	unknown	中川 裕美, 中西 大輔	相互依存性と内集団協力――広島東洋カープファンを対象とした場面想定法実験――	JSSP	Oral	https://iap-jp.org/jssp/conf_archive/detail.php?s=2013-A-0101
A-0110	F(1,118)=5.172	present	absent	p-value	0.025	significant		absent	absent	present	CI	増田 真也	ポジティブな状態を尋ねる項目への回答における配置の効果	JSSP	Poster	https://iap-jp.org/jssp/conf_archive/detail.php?s=2013-A-0110
A-0126	chi2(1)=3.90	present	present	alpha level	NA	significant		present	absent	absent	absent	伊藤 彬, 村田 光二	他者志向的動機づけが失敗経験後の課題達成動機づけに及ぼす影響の検討	JSSP	Poster	https://iap-jp.org/jssp/conf_archive/detail.php?s=2013-A-0126
A-0138	F(1,81)=6.36	present	absent	alpha level	NA	significant		present	absent	absent	absent	今在 慶一朗	手続き的公正感に対する説明と丁寧さの効果	JSSP	Oral	https://iap-jp.org/jssp/conf_archive/detail.php?s=2013-A-0138
A-0140	Z=2.36	present	absent	p-value	0.009	significant		absent	absent	present	absent	小宮 あすか, 大薗 博記, 渡部 幹, 大坪 庸介, 大石 繁宏	住居流動性が謝罪・補償の効果に及ぼす影響	JSSP	Oral	https://iap-jp.org/jssp/conf_archive/detail.php?s=2013-A-0140
A-0149	F(2,910)=286.73	present	present	alpha level	NA	absent		absent	absent	present	absent	松本 良恵, 李 楊, 山岸 俊男	向社会行動とステイクサイズ(1)	JSSP	Oral	https://iap-jp.org/jssp/conf_archive/detail.php?s=2013-A-0149
A-0152	F(12,210)=1.60	present	absent	alpha level	NA	significant		absent	absent	absent	absent	高比良 美詠子, 伊藤 真貴	感情伝達時の顔文字使用が透明性の錯覚に及ぼす影響	JSSP	Poster	https://iap-jp.org/jssp/conf_archive/detail.php?s=2013-A-0152
A-0158	F(1,200)=3.05	absent	absent	alpha level	NA	absent		present	absent	present	absent	北梶 陽子, 大沼 進	社会的ジレンマ状況において虚偽可能でも行動履歴の公開が協力行動をもたらすとき：産業廃棄物不法投棄ゲームによる例証	JSSP	Oral	https://iap-jp.org/jssp/conf_archive/detail.php?s=2013-A-0158
A-0162	F(1,79)=6.14	present	absent	p-value	0.01	significant		absent	absent	present	absent	寺田 未来, 浦 光博	防衛的悲観主義者はなぜ・どのようにして自己調整に成功・失敗するのか―自己調整資源の枯渇の観点から―	JSSP	Oral	https://iap-jp.org/jssp/conf_archive/detail.php?s=2013-A-0162
A-0164	F(2,27)=4.17	present	present	alpha level	NA	significant		absent	absent	present	absent	北村 英哉	恐怖喚起刺激，ポジティブ刺激が喫煙に対する潜在態度に及ぼす効果	JSSP	Poster	https://iap-jp.org/jssp/conf_archive/detail.php?s=2013-A-0164
A-0175	F(1,44)=12.325	present	absent	alpha level	NA	significant		absent	absent	present	SE	相田 直樹, 礒部 智加衣	拒絶感受性が他者からの曖昧な拒絶後の選択的注意に及ぼす影響	JSSP	Poster	https://iap-jp.org/jssp/conf_archive/detail.php?s=2013-A-0175
A-0180	t(98)=2.41	present	present	alpha level	NA	significant		absent	absent	absent	absent	田中 知恵, 原島 雅之	感情状態が自己関連情報の処理に及ぼす影響	JSSP	Poster	https://iap-jp.org/jssp/conf_archive/detail.php?s=2013-A-0180
A-0187	F(1,104)=1.71	present	absent	alpha level	NA	NS		absent	absent	present	SE	尾崎 拓, 中谷内 一也	地震防災行動に及ぼすリスク認知と効果性の影響	JSSP	Oral	https://iap-jp.org/jssp/conf_archive/detail.php?s=2013-A-0187
A-0189	F(1,52)=2.06	present	absent	p-value	0.14	NS		absent	absent	absent	absent	加藤 樹里, 村田 光二	非意識的思考が対人印象の変化に及ぼす影響	JSSP	Poster	https://iap-jp.org/jssp/conf_archive/detail.php?s=2013-A-0189
A-0198	F(1,78)=4.37	present	absent	alpha level	NA	significant		absent	absent	absent	absent	田戸岡 好香, 井上 裕珠, 石井 国雄	マインドセットが上方比較における妬みと羨望に及ぼす影響	JSSP	Poster	https://iap-jp.org/jssp/conf_archive/detail.php?s=2013-A-0198
A-0212	F(1,104)=167.58	present	present	alpha level	NA	significant	ita^2 (partial ita^2)	present	absent	present	unknown	泉 愛, 中西 大輔, 横田 晋大	風評被害の何が問題なのか: 場面想定法実験による検討	JSSP	Oral	https://iap-jp.org/jssp/conf_archive/detail.php?s=2013-A-0212
A-0219	t(16)=2.51	present	present	alpha level	NA	significant		absent	absent	absent	absent	谷田 林士	情動伝染と共感性の関連：生理指標を用いた検討	JSSP	Poster	https://iap-jp.org/jssp/conf_archive/detail.php?s=2013-A-0219
A-0223	F(1,18)=2.58	present	absent	absent	NA	NS		present	SD	absent	absent	道家 瑠見子	予期的後悔が現状維持からの脱却に及ぼす影響	JSSP	Poster	https://iap-jp.org/jssp/conf_archive/detail.php?s=2013-A-0223
A-0224	F(1,234)=13.66	present	absent	alpha level	NA	significant		absent	absent	present	SE	永井 聖剛, 山田 陽平	大きな腕回しは拡散的創造性を高める－創造性における身体の影響－	JSSP	Oral	https://iap-jp.org/jssp/conf_archive/detail.php?s=2013-A-0224
A-0228	F(2,58)=2.80	present	present	p-value	0.07	marginally sig		absent	absent	present	absent	山田 歩, 植田 一博	利用範囲が広いほどプリペイド・カードの魅力は高まるか	JSSP	Oral	https://iap-jp.org/jssp/conf_archive/detail.php?s=2013-A-0228
A-0235	F(2,164)=94.74	present	absent	alpha level	NA	significant		absent	absent	present	absent	垂澤 由美子	社会的アイデンティティの尺度の表現について	JSSP	Poster	https://iap-jp.org/jssp/conf_archive/detail.php?s=2013-A-0235
A-0238	F(1,38)=3.77	present	absent	p-value	0.06	marginally sig		absent	absent	present	absent	平間 一樹, 沼崎 誠	格上・格下相手との競争状況は制御焦点に影響を及ぼすか？	JSSP	Poster	https://iap-jp.org/jssp/conf_archive/detail.php?s=2013-A-0238
A-0243	F(1,60)=6.586	present	absent	p-value	0.013	significant		present	SD	absent	absent	竹澤 正哲, 加藤 早紀, 中分 遥, 須山 巨基, 藤山 直樹	景品表示法とコンプガチャ：カード合わせの心理学的妥当性を検証する	JSSP	Oral	https://iap-jp.org/jssp/conf_archive/detail.php?s=2013-A-0243
A-0251	F(1,114)=4.78	present	absent	p-value	0.03	absent		present	absent	present	absent	小松 瑞歩, 結城 雅樹, 三船 恒裕	関係流動性が突出協力行動の自己規制に与える影響	JSSP	Oral	https://iap-jp.org/jssp/conf_archive/detail.php?s=2013-A-0251
A-0252	F(2,219)=50.7	present	present	alpha level	NA	significant		present	SD	present	absent	山田 順子, 鬼頭 美江, 結城 雅樹	対人関係獲得に伴う競争がパートナー獲得戦略に及ぼす影響	JSSP	Oral	https://iap-jp.org/jssp/conf_archive/detail.php?s=2013-A-0252
A-0253	F(1,154)=7.55	present	present	p-value	0.007	significant		absent	absent	present	unknown	山口 真奈, 大坪 庸介	親密な関係における絆の確認行動に関する探索的研究	JSSP	Poster	https://iap-jp.org/jssp/conf_archive/detail.php?s=2013-A-0253
A-0256	t(33)=3.76	present	present	alpha level	NA	significant		present	SD	absent	absent	櫻井 良祐, 渡辺 匠, 唐沢 かおり	競合目標の達成可能性が焦点目標の遂行に与える影響	JSSP	Oral	https://iap-jp.org/jssp/conf_archive/detail.php?s=2013-A-0256
A-0262	F(2,223)=2.09	present	absent	alpha level	NA	NS		present	SD	absent	absent	桑山 恵真, 村田 光二	戦略的な遡及的悲観主義はネガティブ感情を低減するか？	JSSP	Poster	https://iap-jp.org/jssp/conf_archive/detail.php?s=2013-A-0262
A-0270	F(1,19)=8.00	present	absent	alpha level	NA	significant		present	absent	present	absent	吉野 伸哉, 村田 光二	焦点化解除によるインパクトバイアスの低減-未来日記と夏休みの幸福度-	JSSP	Poster	https://iap-jp.org/jssp/conf_archive/detail.php?s=2013-A-0270
A-0290	F(2,65)=2.15	present	present	alpha level	NA	NS		present	SD	absent	absent	大澤 裕美佳, 池上 知子	ポジティブな非社会的文脈がエイズに対する顕在的態度に及ぼす影響	JSSP	Poster	https://iap-jp.org/jssp/conf_archive/detail.php?s=2013-A-0290
A-0300	F(1,166)=17.20	present	absent	alpha level	NA	significant		present	SD	absent	absent	藤村 まこと ,	購買行動における利用歴が意思決定による後悔に与える影響	JSSP	Poster	https://iap-jp.org/jssp/conf_archive/detail.php?s=2013-A-0300
A-0310	F(1,17)=4.48	present	present	alpha level	NA	significant		present	absent	absent	absent	沼崎 誠, 石井 国雄, 松崎 圭佑, 埴田 健司, 田戸岡 好香	硬さ/柔らかさの触覚が対人認知に及ぼす効果	JSSP	Oral	https://iap-jp.org/jssp/conf_archive/detail.php?s=2013-A-0310
A-0316	F(1,74)=6.53	present	absent	alpha level	NA	significant		present	absent	absent	absent	松尾 由美, 田島 祥, 石井 奈保美, 奥山 洋子, 坂元 章	翻訳チャットリテラシー教育が交流に対する評価を媒介して偏見低減に及ぼす影響の検討	JSSP	Poster	https://iap-jp.org/jssp/conf_archive/detail.php?s=2013-A-0316
A-0318	F(1,54)=1.43	present	absent	p-value	0.24	NS	ita^2 (partial ita^2)	present	SD	present	absent	應治 麻美, 唐沢 穣	社会的規範と解釈レベルの関連性の検討	JSSP	Poster	https://iap-jp.org/jssp/conf_archive/detail.php?s=2013-A-0318
A-0349	t(226)=4.077	present	present	alpha level	NA	significant		absent	absent	absent	absent	鄭 珪熙, 唐沢 かおり	主観的幸福感がシャーデンフロイデの減少に及ぼす影響	JSSP	Poster	https://iap-jp.org/jssp/conf_archive/detail.php?s=2013-A-0349
A-0374	F(4,26)=0.59	present	absent	p-value	0.67	NS		absent	absent	absent	absent	長谷川 由加子, 竹澤 正哲	話し手の生理的喚起が聞き手による二次の情報伝達に与える影響	JSSP	Poster	https://iap-jp.org/jssp/conf_archive/detail.php?s=2013-A-0374
A-0396	F(1,21)=4.78	present	absent	alpha level	NA	significant	ita^2 (partial ita^2)	present	absent	absent	absent	藤島 喜嗣	数量比較が課題遂行方略に及ぼす効果 Mussweiler & Mayer(2011)の追試	JSSP	Poster	https://iap-jp.org/jssp/conf_archive/detail.php?s=2013-A-0396
A-0398	t(354)=-2.74	present	absent	alpha level	NA	significant		absent	absent	present	absent	安部 健太	ペナルティキックにおける成功率の偏った推測	JSSP	Poster	https://iap-jp.org/jssp/conf_archive/detail.php?s=2013-A-0398
A-0399	F(1,1158)=4.21	present	absent	alpha level	NA	absent		absent	absent	absent	absent	村上 史朗	命令的規範からの逸脱と記述的規範認知が行為の責任判断と原因認知に及ぼす効果	JSSP	Poster	https://iap-jp.org/jssp/conf_archive/detail.php?s=2013-A-0399
A-0404	t(5)=2.57	present	absent	alpha level	NA	NS		present	SD	absent	absent	寺嶌 裕登, 五十嵐 祐	潜在的自尊心が自我脅威後の同調に及ぼす影響	JSSP	Poster	https://iap-jp.org/jssp/conf_archive/detail.php?s=2013-A-0404
A-0409	t(24)=1.88	present	absent	alpha level	NA	absent	beta(reg)	absent	absent	absent	absent	小林 智之, 及川 昌典	外集団の重要性がネガティブなメタステレオタイプの働きへ及ぼす影響	JSSP	Oral	https://iap-jp.org/jssp/conf_archive/detail.php?s=2013-A-0409
A-0420	F(1,67)=13.74	present	absent	alpha level	NA	significant		absent	absent	absent	absent	工藤 恵理子	他者の立場で考えるとき－視点取得とシミュレーション方略の違い	JSSP	Poster	https://iap-jp.org/jssp/conf_archive/detail.php?s=2013-A-0420
A-0429	F(1,119)=5.04	present	absent	p-value	0.027	significant		present	SD	present	absent	金田 宗久, 伊藤 君男	ナラティブ形式による情報伝達の影響について	JSSP	Poster	https://iap-jp.org/jssp/conf_archive/detail.php?s=2013-A-0429
A-0430	t(131)=2.43	present	absent	alpha level	NA	significant		present	SD	absent	absent	三船 恒裕, シムノヴィチ ドラ, 山岸 俊男	先制攻撃における内集団バイアス：最小条件集団を用いた実験研究	JSSP	Oral	https://iap-jp.org/jssp/conf_archive/detail.php?s=2013-A-0430
A-0455	t(26)=1.89	present	present	alpha level	NA	significant		present	SD	absent	absent	三ツ矢 慎平, 五十嵐 祐	不公正感低減方略としての他者行動の支持	JSSP	Poster	https://iap-jp.org/jssp/conf_archive/detail.php?s=2013-A-0455
A-0461	F(1,52)=4.63	present	absent	p-value	0.04	significant		absent	absent	absent	absent	金 惠璘, 豊川 航, 亀田 達也	集団の知恵の成立条件を探る：独立性と協調のパラドクス	JSSP	Oral	https://iap-jp.org/jssp/conf_archive/detail.php?s=2013-A-0461
A-0465	F(1,48)=3.40	present	present	p-value	0.07	marginally sig		absent	absent	present	unknown	村田 藍子, 佐々木 超悦	苦痛の共感における情動制御機能―他者の感受性に関する情報が観察者の生理反応に及ぼす影響の検討	JSSP	Oral	https://iap-jp.org/jssp/conf_archive/detail.php?s=2013-A-0465
A-0475	F(1,36)=5.12	present	present	alpha level	NA	significant		absent	absent	present	absent	大江 朋子, 塩沢 萌	温度の知覚が自己評定と他者評定に及ぼす効果：対象物の温度と気温	JSSP	Oral	https://iap-jp.org/jssp/conf_archive/detail.php?s=2013-A-0475
A-0484	F(1,179)=7.03	present	absent	alpha level	NA	absent		present	SD	absent	absent	舟戸 貴織, 唐沢 穣	人物情報の伝達の抽象性が話し手に対する受け手の印象形成に及ぼす影響	JSSP	Poster	https://iap-jp.org/jssp/conf_archive/detail.php?s=2013-A-0484
A-0493	F(4,74)=2.61	present	absent	alpha level	NA	significant		present	SD	absent	absent	遠藤 寛子, 湯川 進太郎	怒りの維持過程に基づいた構造化筆記開示法の開発	JSSP	Poster	https://iap-jp.org/jssp/conf_archive/detail.php?s=2013-A-0493
A-0503	F(1,95)=4.80	present	absent	p-value	0.03	significant		absent	absent	present	absent	津村 健太, 村田 光二	集団成員性が社会的排斥経験後の最親和に与える影響	JSSP	Poster	https://iap-jp.org/jssp/conf_archive/detail.php?s=2013-A-0503
A-0509	F(2,117)=3.77	present	absent	alpha level	NA	significant	ita^2 (partial ita^2)	absent	absent	absent	absent	寺口 司, 釘原 直樹	ラベリングと評価者の立場の違いが攻撃評価に及ぼす影響―原因帰属からの検討―	JSSP	Poster	https://iap-jp.org/jssp/conf_archive/detail.php?s=2013-A-0509
A-0517	F(1,89)=4.7	present	absent	alpha level	NA	absent		present	SD	absent	absent	森 久美子 ,	チャリティへの寄付を公言することは好印象につながるか	JSSP	Poster	https://iap-jp.org/jssp/conf_archive/detail.php?s=2013-A-0517
A-0519	F(2,203)=3.94	present	absent	alpha level	NA	significant		present	SD	absent	absent	森下 雄輔, 谷口 淳一	リーダーとフォロワーの意見対立時におけるリーダー評価過程の検討	JSSP	Poster	https://iap-jp.org/jssp/conf_archive/detail.php?s=2013-A-0519
A-0521	chi2(1)=3.5	present	present	alpha level	NA	marginally sig		absent	absent	absent	absent	曽根 美幸	囚人のジレンマゲームにおいて視点取得が協力率に与える影響	JSSP	Poster	https://iap-jp.org/jssp/conf_archive/detail.php?s=2013-A-0521
A-0523	chi2(3)=1213.67	present	present	alpha level	NA	significant		present	absent	absent	absent	赤須 大典	集団同一視としての集団成員評価と自己評価の一致	JSSP	Poster	https://iap-jp.org/jssp/conf_archive/detail.php?s=2013-A-0523
A-0530	F(1,41)=3.70	present	absent	p-value	0.06	marginally sig		present	SE	absent	absent	井上 和哉, 菊地 正, 佐藤 暢哉	行為の主体感は好意の形成を促進するか	JSSP	Poster	https://iap-jp.org/jssp/conf_archive/detail.php?s=2013-A-0530
A-0545	F(9,666)=9.35	present	absent	alpha level	NA	significant		absent	absent	present	absent	野波 寛, 責任発表者 野波 寛, 坂本 剛, 大友 章司, 田代 豊	地層処分場の決定権をめぐる多様なアクターの正当性 “誰がなぜゲーム／NIMBY版”における当事者と非当事者に情報環境が及ぼす影響	JSSP	Oral	https://iap-jp.org/jssp/conf_archive/detail.php?s=2013-A-0545
A-0552	F(4,228)=200.09	present	present	alpha level	NA	significant		present	SD	absent	absent	風間 文明	社会的勢力の自己認知と勢力保持者に対する選好の関係	JSSP	Poster	https://iap-jp.org/jssp/conf_archive/detail.php?s=2013-A-0552
A-0567	t(91)=2.86	present	absent	alpha level	NA	absent		present	absent	absent	absent	福田 怜生	広告における消費者の積極的な情報処理に関する一考察	JSSP	Poster	https://iap-jp.org/jssp/conf_archive/detail.php?s=2013-A-0567
A-0574	F(4,83)=3.053	absent	absent	alpha level	NA	significant		present	SD	absent	absent	新井 洋輔	NPO団体におけるスキル継承過程の検討（４）	JSSP	Poster	https://iap-jp.org/jssp/conf_archive/detail.php?s=2013-A-0574
A-0580	F(1,400)=4.05	present	present	alpha level	NA	significant		absent	absent	present	absent	池口 愛	大学生の集団意識と社会的排斥との関連について―黒い羊効果と個人差について―	JSSP	Poster	https://iap-jp.org/jssp/conf_archive/detail.php?s=2013-A-0580
3AM-016		present	absent	p-value	0.03	significant		absent	absent	present	SE	伊藤 言, 高野 陽太郎	地震の顕現化と死の顕現化に随伴する補償行動：内集団防衛とおもしろさ認知のおもてうら	JPA	Poster	https://doi.org/10.4992/pacjpa.77.0_3AM-016
3PM-028	r=.37	present	present	p-value	0.06	marginally sig	r	absent	absent	absent	absent	藤島 喜嗣	メタ知覚の正確さに時間的距離が及ぼす影響	JPA	Poster	https://doi.org/10.4992/pacjpa.77.0_3PM-028
A-0188		present	present	p-value	0.009	significant	beta(reg)	absent	absent	present	absent	宮崎 弦太, 矢田 尚也, 池上 知子	親密な二者関係での交換不安に状態自尊心と交換規範志向性が及ぼす影響	JSSP	Poster	https://iap-jp.org/jssp/conf_archive/detail.php?s=2013-A-0188
A-0269		present	absent	p-value	0.87	NS		absent	absent	absent	absent	堀田 結孝, 竹澤 正哲	第三者罰の理由：評判と行動変容	JSSP	Oral	https://iap-jp.org/jssp/conf_archive/detail.php?s=2013-A-0269
A-0345		present	present	p-value	0.313	NS		absent	absent	absent	absent	大友 章司	環境デザイン刺激による習慣的食品摂取行動の抑制	JSSP	Oral	https://iap-jp.org/jssp/conf_archive/detail.php?s=2013-A-0345
A-0529		present	present	p-value	0.047	significant	beta(reg)	absent	absent	absent	absent	八木 彩乃, 大坪 庸介	二者間の関係性が罪悪感におよぼす影響について	JSSP	Poster	https://iap-jp.org/jssp/conf_archive/detail.php?s=2013-A-0529

## Sheet: 2018_included_studies
Research.ID	p-stats	N	n	p_info	pval	sig	es_type	gr_mean_info	gr_var_info	gr_mean_plot	gr_var_plot	Authors	Title	Conference	Poster/Oral	URL
1AM-009	t(31)=2.89	present	absent	alpha level	NA	significant		absent	absent	absent	absent	濱 保久	インテリアが対人コミュニケーションに及ぼす影響	JPA	Poster	https://doi.org/10.4992/pacjpa.82.0_1AM-009
1AM-013	t(33)=3.32	present	present	alpha level	NA	significant		present	SD	absent	absent	李 瑋琳, 宮下 達哉, 岡 隆	偏見の低減への認知的不協和理論に基づく偽善モデルの適用	JPA	Poster	https://doi.org/10.4992/pacjpa.82.0_1AM-013
1AM-015	t(33)=1.17	present	absent	p-value	0.25	NS	Cohen d (Hedge's g)	present	SD	absent	absent	堀川 佑惟, 岡 隆	レズビアンに対する女性異性愛者の態度に仮想接触が及ぼす効果	JPA	Poster	https://doi.org/10.4992/pacjpa.82.0_1AM-015
1AM-027	F(1,35)=4.56	present	present	p-value	0.04	significant	ita^2 (partial ita^2)	absent	absent	present	SD	宮下 達哉, 山村 豊, 岡 隆	大学生のパーソナルスペースは1か月で縮まるの？	JPA	Poster	https://doi.org/10.4992/pacjpa.82.0_1AM-027
1EV-006	F(1,13)=11.84	present	present	p-value	0.004	significant	ita^2 (partial ita^2)	present	SE	present	absent	畑 敏道, 渡邉 健也	ラットはフリーライダーへの報酬分配を避けるのか?	JPA	Poster	https://doi.org/10.4992/pacjpa.82.0_1EV-006
1EV-014	F(2,151)=6.01	present	absent	alpha level	NA	significant	ita^2 (partial ita^2)	absent	absent	present	absent	清水 由紀, James S. Uleman	行動観察時における人物と状況への注意の文化差	JPA	Poster	https://doi.org/10.4992/pacjpa.82.0_1EV-014
2AM-022	F(1,38)=4.83	present	absent	p-value	0.03	significant		absent	absent	absent	absent	石井 国雄, 田戸岡 好香	ピンクの衣服が自己認知と摂食行動に及ぼす影響	JPA	Poster	https://doi.org/10.4992/pacjpa.82.0_2AM-022
2AM-025	F(1,68)=2.87	present	present	alpha level	NA	marginally sig		absent	absent	present	absent	村上 幸史	的中の時間的影響に関する探索的研究―purify実験の概念的追試から―	JPA	Poster	https://doi.org/10.4992/pacjpa.82.0_2AM-025
2EV-006	F(2,103)=1020.16	present	absent	alpha level	NA	significant		absent	absent	present	unknown	野田 理世, 田邊 宏樹	連続して増減する価格が価値判断に及ぼす影響	JPA	Poster	https://doi.org/10.4992/pacjpa.82.0_2EV-006
2EV-007	chi2(5)=5.00	present	absent	alpha level	NA	NS		absent	absent	absent	absent	品田 瑞穂	身体的同期が望ましくない利他行動に与える影響	JPA	Poster	https://doi.org/10.4992/pacjpa.82.0_2EV-007
3AM-019	F(1,37)=1.68	present	absent	p-value	0.203	NS	ita^2 (partial ita^2)	absent	absent	absent	absent	上窪 綾, 胡 中凡, 蕭 富仁, 蕭 乃菁, 北山 忍, Brian Kraus, Cristina E Salvador, 唐澤 真弓	ERPからみる自他認識の文化的バイアス	JPA	Poster	https://doi.org/10.4992/pacjpa.82.0_3AM-019
3EV-006	F(4,516)=22.81	absent	absent	alpha level	NA	significant		absent	absent	absent	absent	朴 ゴウン, 村田 光二, 唐沢 穣	道徳判断におけるシステム脅威の影響	JPA	Poster	https://doi.org/10.4992/pacjpa.82.0_3EV-006
3EV-008	F(1,153)=6.24	present	absent	alpha level	NA	significant	ita^2 (partial ita^2)	absent	absent	present	absent	野﨑 秀正	大学生における「ほめ」の友人関係維持機能―「ほめ」の根拠の有無と関係の親密度の違いからの検討―	JPA	Poster	https://doi.org/10.4992/pacjpa.82.0_3EV-008
3EV-014	F(2,64)=2.64	present	present	alpha level	NA	marginally sig		absent	absent	present	absent	針原 素子	見知らぬ他者との相互作用が及ぼす心理的影響:通学時の経験を用いた実験的検討	JPA	Poster	https://doi.org/10.4992/pacjpa.82.0_3EV-014
3PM-005	F(1,30)=4.83	present	absent	alpha level	NA	significant	ita^2 (partial ita^2)	absent	absent	present	absent	藤 桂, 永井 聖剛	仮想の温かさに触れ，現実のぬくもりを求め―仮想現実環境における身体感覚が所属欲求の喚起に及ぼす影響―	JPA	Poster	https://doi.org/10.4992/pacjpa.82.0_3PM-005
3PM-006	F(30,630)=3.61	present	present	p-value	0.001	significant	ita^2 (partial ita^2)	present	other	absent	absent	藤田 弥世, 山本 法子, 高野 了太, 松村 遼平, 野村 理朗	同一人種間における曖昧な表情への知覚の個人差に関する検討―中国人に対する表情知覚に関するfNIRSを用いた検討―	JPA	Poster	https://doi.org/10.4992/pacjpa.82.0_3PM-006
3PM-013	t(53)=6.403	present	present	alpha level	NA	significant		present	absent	present	absent	橋本 佳奈, 宮本 聡介	対人相互作用場面での対人不安者の解釈・判断バイアス	JPA	Poster	https://doi.org/10.4992/pacjpa.82.0_3PM-013
3PM-020	t(64)=-2.02	present	absent	alpha level	NA	significant		present	SE	present	unknown	小野 由莉花, 及川 昌典	ツァイガルニック転移効果―未完結ストーリーが興味・関心と侵入思考に及ぼす影響―	JPA	Poster	https://doi.org/10.4992/pacjpa.82.0_3PM-020
3PM-023	t(45)=2.00	present	present	p-value	0.05	significant		present	absent	absent	absent	山本 雄大	差別受容における踏み石効果の検討	JPA	Poster	https://doi.org/10.4992/pacjpa.82.0_3PM-023
A-0005	F(2,69)=1.00	present	present	p-value	0.37	NS	ita^2 (partial ita^2)	absent	absent	present	SD	樋口 匡貴, 宮武 沙苗	宗教プライミングによる偏見および向社会性への影響 Clobert, Saroglou, & Hwang (2015) の追試的検討	JSSP	Poster	https://iap-jp.org/jssp/conf_archive/detail.php?s=2018-A-0005
A-0015	F(3,78)=19.22	absent	absent	alpha level	NA	significant	ita^2 (partial ita^2)	absent	absent	absent	absent	堀川 佑惟, 岡 隆	精神疾患者とネガティブなステレオタイプとの連合に仮想接触が及ぼす効果 ―代替思考としての仮想接触の役割に注目した検討―	JSSP	Poster	https://iap-jp.org/jssp/conf_archive/detail.php?s=2018-A-0015
A-0016	t(52)=-0.832	present	absent	p-value	0.409	absent	B(reg)	absent	absent	absent	absent	北村 英哉, 小林 麻衣, 木村 はるか	恨まれる状況の喚起と恨み忌避傾向が他者の表情検出に及ぼす効果 ―怒り、悲しみ、喜びの表情からの感情読み取り課題を通して―	JSSP	Oral	https://iap-jp.org/jssp/conf_archive/detail.php?s=2018-A-0016
A-0031	F(1,97)=12.51	present	absent	p-value	NA	significant		absent	absent	present	absent	寺田 未来, 金森 啓介	大学生の授業参加意欲と教員との心理的距離との関連 解釈レベルを用いた検討	JSSP	Poster	https://iap-jp.org/jssp/conf_archive/detail.php?s=2018-A-0031
A-0034	F(1,143)=3.92	absent	absent	alpha level	NA	significant	ita^2 (partial ita^2)	absent	absent	absent	absent	杉谷 陽子, 外川 拓	文化的自己観とブランド価値 解釈レベルによる調整効果の検討	JSSP	Oral	https://iap-jp.org/jssp/conf_archive/detail.php?s=2018-A-0034
A-0042	F(2,54)=2.82	present	absent	p-value	0.07	marginally sig	ita^2 (partial ita^2)	absent	absent	present	SE	平野 万由子, 工藤 恵理子	競争的文脈における視点取得が対人認知に及ぼす効果 文脈から焦点を外した視点取得は他者との対立を弱めるか	JSSP	Poster	https://iap-jp.org/jssp/conf_archive/detail.php?s=2018-A-0042
A-0044	t(499.08)=-1.06	present	present	p-value	0.29	NS		absent	absent	absent	absent	木村 邦博, 上原 俊介	質問紙への回答における文脈効果のメカニズム ―プライミングの影響の抑制による印象操作検出の試み―	JSSP	Poster	https://iap-jp.org/jssp/conf_archive/detail.php?s=2018-A-0044
A-0045	t(88)=1.52	present	absent	p-value	0.13	NS	Cohen d (Hedge's g)	present	absent	absent	absent	中村 早希, 三浦 麻子	賛否の異なる2者から説得される状況での態度変容プロセスの検証	JSSP	Poster	https://iap-jp.org/jssp/conf_archive/detail.php?s=2018-A-0045
A-0068	F(1,52)=5.28	present	present	p-value	0.026	absent		present	absent	absent	absent	菅 さやか, 宮本 聡介, 太幡 直也	説明経験が説明対象の実在性認知に与える影響2 菅・宮本・太幡 (2015) の再検証	JSSP	Poster	https://iap-jp.org/jssp/conf_archive/detail.php?s=2018-A-0068
A-0078	F(1,58)=7.61	present	absent	p-value	0.008	significant	ita^2 (partial ita^2)	absent	absent	present	SE	本田 志穂, 小宮 あすか, 中西 大輔, 小杉 考司	集団意思決定のゲーム構造がLINEの返信行動に及ぼす影響	JSSP	Poster	https://iap-jp.org/jssp/conf_archive/detail.php?s=2018-A-0078
A-0084	F(1,75)=18.07	present	absent	alpha level	NA	significant	ita^2 (partial ita^2)	present	absent	present	unknown	金内 さよ, 三浦 麻子, 唐沢 穣	報復や報恩は連鎖するか 社会的地位関係の変化が報酬分配に及ぼす影響	JSSP	Oral	https://iap-jp.org/jssp/conf_archive/detail.php?s=2018-A-0084
A-0103	F(2,170)=28.10	present	present	alpha level	NA	significant	ita^2 (partial ita^2)	present	absent	absent	absent	岡村 靖人, 浦 光博	くすぐったいなら離れよう、でも痒いなら近づこう	JSSP	Poster	https://iap-jp.org/jssp/conf_archive/detail.php?s=2018-A-0103
A-0117	F(1,75)=3.999	present	present	alpha level	NA	significant		absent	absent	absent	absent	杉田 明日香, 有馬 淑子	プライミング刺激が道徳不活性化と攻撃性に及ぼす影響	JSSP	Poster	https://iap-jp.org/jssp/conf_archive/detail.php?s=2018-A-0117
A-0133	F(1,38)=4.17	present	absent	alpha level	NA	significant	ita^2 (partial ita^2)	absent	absent	absent	absent	荒井 崇史, 戸高 美佳, 金政 祐司	暴力への潜在的態度が暴力行為に及ぼす影響	JSSP	Poster	https://iap-jp.org/jssp/conf_archive/detail.php?s=2018-A-0133
A-0142	t(498)=3.49	present	absent	alpha level	NA	significant	beta(reg)	absent	absent	absent	absent	三好 理央, 浦 光博	ダークトライアドが皮肉へのユーモア生起に及ぼす影響 逸脱の無害化がユーモアへとつながる	JSSP	Poster	https://iap-jp.org/jssp/conf_archive/detail.php?s=2018-A-0142
A-0150	t(10)=2.86	absent	absent	alpha level	NA	significant		present	SD	absent	absent	Shou Qiulu, Wang Xiaoyi	How an anthropomorphic product affects self-control when making purchase decision Based the study of ERP	JSSP	Poster	https://iap-jp.org/jssp/conf_archive/detail.php?s=2018-A-0150
A-0156	t(32)=1.21	present	present	p-value	0.24	absent		absent	absent	present	absent	高野 了太, 野村 理朗	畏敬の念は利他的行動を促進するのか？ 認知的スキーマ更新の観点から	JSSP	Poster	https://iap-jp.org/jssp/conf_archive/detail.php?s=2018-A-0156
A-0157	F(1,61)=0.70	present	present	p-value	0.41	NS	ita^2 (partial ita^2)	absent	absent	present	absent	高橋 望	モデルの表情と性別が衣服の好ましさに与える影響 ―日本人女性を評定者とした検討―	JSSP	Poster	https://iap-jp.org/jssp/conf_archive/detail.php?s=2018-A-0157
A-0158	t(29)=17.72	present	absent	alpha level	NA	significant		absent	absent	present	SD	藏口 佳奈	顔の同定判断は魅力の影響を受けるか 顔に対する観察経験と魅力の効果の検証	JSSP	Poster	https://iap-jp.org/jssp/conf_archive/detail.php?s=2018-A-0158
A-0173	F(1,103)=62.35	present	absent	alpha level	NA	significant		present	absent	absent	absent	田中 知恵	送り手の集団成員性が受け手の感情共有に及ぼす影響	JSSP	Poster	https://iap-jp.org/jssp/conf_archive/detail.php?s=2018-A-0173
A-0175	F(1,22)=4.49	absent	absent	alpha level	NA	significant		absent	absent	present	absent	浅野 龍平, 野村 理朗, 浦 光博	ゴールコンフリクトが自己の態度認知に及ぼす影響	JSSP	Poster	https://iap-jp.org/jssp/conf_archive/detail.php?s=2018-A-0175
A-0177	F(2,48)=136.63	present	present	alpha level	NA	significant		present	SD	absent	absent	大坪 庸介, 松永 昌宏, 日道 俊之, 鈴木 孝太, 柴田 英治, 堀 礼子, 梅村 朋弘, 大平 英樹	集団によるコストのかかる謝罪の効果 fMRIを用いた集団謝罪に関する社会神経科学的研究	JSSP	Oral	https://iap-jp.org/jssp/conf_archive/detail.php?s=2018-A-0177
A-0187	F(4,96)=2.98	present	absent	p-value	0.023	significant	ita^2 (partial ita^2)	absent	absent	present	SE	埴田 健司, 蒲谷 瑞季	サポーティブな他者の想起は「やる気」を高めるか？ ソーシャル・サポートと自我枯渇状況下における課題のパフォーマンス	JSSP	Poster	https://iap-jp.org/jssp/conf_archive/detail.php?s=2018-A-0187
A-0188	F(1,177)=13.572	present	absent	alpha level	NA	significant		absent	absent	present	absent	高橋 綾子, 滝口 雄太, 桐生 正幸	妖怪の生起メカニズムと社会的役割の検討（1） 他者による承認が非科学的事象遭遇時の感情喚起に与える効果	JSSP	Poster	https://iap-jp.org/jssp/conf_archive/detail.php?s=2018-A-0188
A-0195	t(164)=0.40	present	absent	p-value	0.687	NS	Cohen d (Hedge's g)	absent	absent	present	unknown	古川 善也, 中島 健一郎	不道徳な人物との下方比較によるモラルライセンシング	JSSP	Poster	https://iap-jp.org/jssp/conf_archive/detail.php?s=2018-A-0195
A-0197	F(2,73)=5.00	present	absent	alpha level	NA	significant		present	SD	absent	absent	齋木 彩, 田中 知恵	時間的距離感と想像の抽象度が未来の自己のポジティブさの知覚に及ぼす影響	JSSP	Oral	https://iap-jp.org/jssp/conf_archive/detail.php?s=2018-A-0197
A-0200	F(1,20)=28.70	present	present	alpha level	NA	significant	ita^2 (partial ita^2)	absent	absent	present	SE	中井 彩香, 森川 健太, 沼崎 誠	自尊心IATにおける刺激語がIAT効果に与える影響 ジェンダー・ステレオタイプ関連語を用いた検討	JSSP	Poster	https://iap-jp.org/jssp/conf_archive/detail.php?s=2018-A-0200
A-0205	F(1,366)=0.05	present	present	p-value	0.818	NS	ita^2 (partial ita^2)	absent	absent	absent	absent	平石 界, 孫 徳賦, 高橋 茉初, 藤崎 千佳	家族と男女の進化心理学を追試する（2） Hasleton & Buss (2000), Laham et al. (2005), Healey & Ellis (2007)	JSSP	Poster	https://iap-jp.org/jssp/conf_archive/detail.php?s=2018-A-0205
A-0207	F(2,58)=2.86	present	absent	p-value	0.07	marginally sig		present	SD	absent	absent	ターン 有加里ジェシカ, 村田 光二, 唐沢 かおり	犯罪者の子どもと連合的スティグマ ――遺伝的本質主義の観点から――	JSSP	Poster	https://iap-jp.org/jssp/conf_archive/detail.php?s=2018-A-0207
A-0219	F(1,56)=3.72	present	absent	p-value	0.059	marginally sig		present	absent	present	unknown	高林 久美子	家事育児と仕事の目標 ―特性レベルからの検討―	JSSP	Poster	https://iap-jp.org/jssp/conf_archive/detail.php?s=2018-A-0219
A-0230	t(9)=2.15	present	absent	p-value	0.06	marginally sig		absent	absent	absent	absent	木村 ゆみ, 吉崎 一人	共同作業事態における課題表象と共感性の関係 go / no-goフランカー課題を用いた検討	JSSP	Poster	https://iap-jp.org/jssp/conf_archive/detail.php?s=2018-A-0230
A-0243	F(2,319)=0.49	present	present	p-value	0.612	NS		present	SD	absent	absent	山本 晶友, 樋口 匡貴	より大きい恩恵を考えた後の感謝 8種類の恩恵シナリオを用いた検討	JSSP	Oral	https://iap-jp.org/jssp/conf_archive/detail.php?s=2018-A-0243
A-0265	F(2,67)=4.64	present	present	alpha level	NA	significant	ita^2 (partial ita^2)	present	SD	present	unknown	小森 めぐみ	物語接触が関連行動の生起に及ぼす影響 Fantasy Realization Theoryに基づく同一視の抑制的影響の検討	JSSP	Poster	https://iap-jp.org/jssp/conf_archive/detail.php?s=2018-A-0265
A-0275	F(1,48)=1.19	present	absent	p-value	0.31	absent		absent	absent	present	absent	小浜 駿, 高田 治樹	先延ばしの際に生じる意識は課題成績に影響を及ぼすか？(2) 先延ばしを低減するためのタイプ別教示とその効果	JSSP	Poster	https://iap-jp.org/jssp/conf_archive/detail.php?s=2018-A-0275
A-0286	F(1,277)=85.11	present	absent	alpha level	NA	significant		present	absent	absent	absent	新井田 恵美, 堀毛 一也	評判が短期配偶志向に与える影響： 社会人を対象とした検討	JSSP	Poster	https://iap-jp.org/jssp/conf_archive/detail.php?s=2018-A-0286
A-0288	F(1,143)=3.93	present	absent	alpha level	NA	significant		absent	absent	absent	absent	野波 寛, 坂本 剛, 大友 章司, 田代 豊, 青木 俊明	NIMBY施設の受容をめぐるマルチアクター評価モデル 立地地域少数者が求める行政の手続き的公正と域外多数者の関心	JSSP	Oral	https://iap-jp.org/jssp/conf_archive/detail.php?s=2018-A-0288
A-0289	F(2,473)=5.31	present	absent	alpha level	NA	significant		absent	absent	present	unknown	増井 啓太, 浦 光博	毒をもって毒を制す 「ダークな」人たちがリーダーに選ばれる時	JSSP	Poster	https://iap-jp.org/jssp/conf_archive/detail.php?s=2018-A-0289
A-0296	F(2,137)=2.37	present	present	p-value	0.1	marginally sig		present	absent	absent	absent	石井 国雄, 田戸岡 好香	赤の服装が女性に対する性的魅力と意図の推測に及ぼす影響	JSSP	Poster	https://iap-jp.org/jssp/conf_archive/detail.php?s=2018-A-0296
A-0309	F(1,1476)=6.33	present	present	p-value	0.01	significant	ita^2 (partial ita^2)	present	absent	present	unknown	村山 綾, 三浦 麻子	内在的公正推論における世代間比較 日米における傾向の把握	JSSP	Poster	https://iap-jp.org/jssp/conf_archive/detail.php?s=2018-A-0309
A-0317	F(2,92)=4.41	present	absent	alpha level	NA	significant		present	absent	present	absent	天野 陽一	同性他者の意見にもとづく異性の魅力評価 ターゲットの身体的魅力による調整効果の検討	JSSP	Poster	https://iap-jp.org/jssp/conf_archive/detail.php?s=2018-A-0317
A-0331	t(28)=0.35	present	absent	absent	NA	NS		absent	absent	absent	absent	竹内 真純, 片桐 恵子	高齢者になった自己を想像することの心理的影響	JSSP	Poster	https://iap-jp.org/jssp/conf_archive/detail.php?s=2018-A-0331
A-0333	F(2,112)=0.71	present	absent	p-value	0.495	NS		present	SD	absent	absent	金子 迪大, 尾崎 由佳	社会的排斥と時間選好（3） 期限有報酬課題への反応の検討	JSSP	Poster	https://iap-jp.org/jssp/conf_archive/detail.php?s=2018-A-0333
A-0336	F(6,495)=3.12	present	present	alpha level	NA	significant	ita^2 (partial ita^2)	absent	absent	present	SD	山本 恭子	欺瞞的コミュニケーションにおける動機と上下関係の影響	JSSP	Poster	https://iap-jp.org/jssp/conf_archive/detail.php?s=2018-A-0336
A-0338	F(2,275)=0.18	present	present	alpha level	NA	NS	R^2 (adj. R^2)	present	absent	absent	absent	藤島 喜嗣, 渡邊 寛, 平石 界, 三浦 麻子	偶然に存在する数値の係留効果と認知欲求による調整 Critcher & Gilovich (2008, 研究2)の直接的追試	JSSP	Poster	https://iap-jp.org/jssp/conf_archive/detail.php?s=2018-A-0338
A-0358	F(1,34)=8.99	present	present	alpha level	NA	significant		absent	absent	present	SE	松尾 和弥, 大浦 真一, 島 義弘, 稲垣 勉, 福井 義一	社会的排斥が曖昧表情の弁別に及ぼす影響	JSSP	Poster	https://iap-jp.org/jssp/conf_archive/detail.php?s=2018-A-0358
A-0362	F(1,208)=11.21	present	present	p-value	0.001	significant	ita^2 (partial ita^2)	present	SD	absent	absent	高松 礼奈	見識ある自己利益がトロッコ課題の行動選択に与える影響 利己的なだけではだめでも, 他者のためにもなるなら良い？	JSSP	Poster	https://iap-jp.org/jssp/conf_archive/detail.php?s=2018-A-0362
A-0389	r(38)=.45	present	present	alpha level	NA	significant	r	absent	absent	absent	absent	阿形 亜子	親密な他者との関係性とリスクテイク傾向	JSSP	Poster	https://iap-jp.org/jssp/conf_archive/detail.php?s=2018-A-0389
2AM-023		present	absent	p-value	0.024	absent		present	SD	absent	absent	河村 悠太, 楠見 孝	過剰な利他主義者は評判を獲得できるか（2）	JPA	Poster	https://doi.org/10.4992/pacjpa.82.0_2AM-023
3AM-026		present	present	p-value	0.04	significant	beta(reg)	absent	absent	absent	absent	坂田 千文, 上田 祥行, 野村 理朗	固執する態度の緩和に与える対立場面状況の影響	JPA	Poster	https://doi.org/10.4992/pacjpa.82.0_3AM-026
3PM-010		present	present	p-value	0.003	significant	beta(reg)	absent	absent	present	absent	渡邊 智也, 楠見 孝	演劇体験が社会的能力に及ぼす影響	JPA	Poster	https://doi.org/10.4992/pacjpa.82.0_3PM-010
A-0079	t=2.09	present	present	p-value	0.038	significant	R^2 (adj. R^2)	present	SD	absent	absent	小宮 あすか, 大石 繁宏, Motyl Matt	住居流動性が平等分配規範に及ぼす影響 仮想場面法を用いた検討	JSSP	Poster	https://iap-jp.org/jssp/conf_archive/detail.php?s=2018-A-0079
A-0115		present	present	p-value	0.01	significant		absent	absent	absent	absent	玉井 颯一, 五十嵐 祐	Ostracism for maximizing the whole benefit of the group: Psychological process of suppressing social pain associated with ostracizing	JSSP	Oral	https://iap-jp.org/jssp/conf_archive/detail.php?s=2018-A-0115
A-0203		present	absent	p-value	0.68	NS	B(reg)	absent	absent	present	absent	外尾 安由子, 池上 知子	恋人の愛着機能は幼少期の愛着を補償するか 青年期の自己受容への影響	JSSP	Poster	https://iap-jp.org/jssp/conf_archive/detail.php?s=2018-A-0203
A-0276		present	present	p-value	0.02	significant	beta(reg)	absent	absent	present	SE	秋保 亮太, 越智 宏朗, 山口 裕幸, 池田 浩	共有リーダーシップの効果はダイバーシティに左右されるか 性別ダイバーシティの調整効果に関する実験的検討	JSSP	Poster	https://iap-jp.org/jssp/conf_archive/detail.php?s=2018-A-0276
A-0319		present	absent	p-value	0.013	absent	beta(reg)	absent	absent	absent	absent	竹村 幸祐, 福島 慎太郎, 内田 由紀子	自分と他者の住居流動性はどちらが問題か？ 協力規範と協力行動の関係を弱める干渉効果	JSSP	Oral	https://iap-jp.org/jssp/conf_archive/detail.php?s=2018-A-0319
A-0339		present	absent	p-value	0.098	absent		absent	absent	present	absent	松崎 圭佑, 沼崎 誠	熟慮－実行マインドセットが確証的な情報探索に及ぼす影響	JSSP	Poster	https://iap-jp.org/jssp/conf_archive/detail.php?s=2018-A-0339
A-0349		present	absent	p-value	0.58	NS		absent	absent	absent	absent	井上 裕珠	妬みの知覚が資源分配に及ぼす影響 ―妬みを知覚する際の言語的手がかりに注目して―	JSSP	Poster	https://iap-jp.org/jssp/conf_archive/detail.php?s=2018-A-0349
A-0356		present	absent	p-value	0.062	significant	B(reg)	absent	absent	absent	absent	安野 智子	世論調査の提示が情報探索に及ぼす影響	JSSP	Poster	https://iap-jp.org/jssp/conf_archive/detail.php?s=2018-A-0356

## Sheet: code book
col name	explanation	levels	memo
Research.ID
p-stats	P-stats reported (unavailable for several papers).
N	Presence of information on the number of total participants.	absent, present, other
n	Presence of information on the number of participants in each sub-group.	absent, present, other
p_info	Presence and type of information about the p-value.	absent, alpha level (e.g., p < .05), p-value (e.g., p = .043)
pval	The p-value reported in the paper.
sig	Description of the level of statistical significance in the paper.	NS, marginally significant, significant, absent, other
es_type	Type of the effect size reported.
gr_mean_info	Presence of information about group mean.	absent, present, other
gr_var_info	Presence of information about group variance.	absent, SD, SE, CI, unknown, other
gr_mean_plot	Presence of graphical presentation of group means (e.g., bar plot).	absent, present, other
gr_var_plot	Presence of graphical presentation of group variances (e.g., box-plot, error bars).	absent, SD, SE, CI, unknown, other
Authors	Presentation authors (in Japanese)
Title	Presentation title (in Japanese)
Conference	JSSP or JPA
Poster/Oral	Presentation format (poster or oral)		There 25 and 9 oral presentations at the JSSP in 2013 and 2018, respectively.
URL	URL of the study in the conference archive (e.g., doi).
