# Supplementary material for: A systematic review of conference papers presented at two large Japanese psychology conferences in 2013 and 2018: did Japanese social psychologists selectively report p < 0.05 results without peer review?
Source: PeerJ journal article supplement (doi:10.7717/peerj.16763), 2024-01-18
Supplement: Zcurve.pdf [file Zcurve.pdf]

## Supplementary 5

We conducted several sensitivity analyses with the  $z$ -curve analysis. First, there were three different methods of estimation; Expectancy-Maximization (EM), Kernel Density 1 (KD1), and Kernel Density 2 (KD2). Second, there were several sets of data. For the primary analyses, we employed either  $p$ -values or  $p$ -stats (statistical information sufficient to compute the  $p$ -value) that appeared first in a paper (first  $p$ -stats/ $p$ -value). For sensitivity analyses, we employed  $p$ -stats/ $p$ -value that appeared last in a paper (last  $p$ -stats/ $p$ -value). We also employed the first and last  $p$ -stats only as we did with the  $p$ -curve analyses. The results are summarized in the following tables (Table S5-1 to S5-4). In the following, ERR denotes Expected Replication Rate; EDR denotes Expected Discovery Rate; FDR denotes the maximum False Discovery Rate; ODR denotes Observed Discovery Rate.

**Table S5-1. Z-curve analyses with papers in 2013 either with first or last  $p$ -stats/ $p$ -values**

|          |       | $p$ -stats/ $p$ -values |       |       |  |          |       |       |
|----------|-------|-------------------------|-------|-------|--|----------|-------|-------|
|          | mean  | First                   |       |       |  | Last     |       |       |
| method   | power | estimate                | lower | upper |  | estimate | lower | upper |
| EM       | ERR   | 0.31                    | 0.16  | 0.48  |  | 0.35     | 0.21  | 0.53  |
|          | EDR   | 0.07                    | 0.05  | 0.15  |  | 0.10     | 0.05  | 0.32  |
|          | FDR   | 0.68                    | 0.30  | 1.00  |  | 0.49     | 0.11  | 1.00  |
| KD2      | ERR   | 0.33                    | 0.15  | 0.47  |  | 0.38     | 0.21  | 0.58  |
|          | EDR   | 0.07                    | 0.05  | 0.24  |  | 0.17     | 0.05  | 0.35  |
|          | FDR   | 0.67                    | 0.17  | 1.00  |  | 0.40     | 0.10  | 1.00  |
| KD1      | ERR   | 0.34                    | 0.14  | 0.49  |  | 0.39     | 0.210 | 0.60  |
| Observed | ODR   | 0.76                    | 0.66  | 0.84  |  | 0.66     | 0.56  | 0.75  |

**Table S5-2. Z-curve analyses with papers in 2013 either with first or last  $p$ -stats**

|          |       | $p$ -stats |       |       |  |          |       |       |
|----------|-------|------------|-------|-------|--|----------|-------|-------|
|          | mean  | First      |       |       |  | Last     |       |       |
| method   | power | estimate   | lower | upper |  | estimate | lower | upper |
| EM       | ERR   | 0.33       | 0.17  | 0.48  |  | 0.37     | 0.21  | 0.56  |
|          | EDR   | 0.07       | 0.05  | 0.15  |  | 0.08     | 0.05  | 0.28  |
|          | FDR   | 0.67       | 0.30  | 1.00  |  | 0.59     | 0.13  | 1.00  |
| KD2      | ERR   | 0.34       | 0.15  | 0.50  |  | 0.39     | 0.20  | 0.59  |
|          | EDR   | 0.07       | 0.05  | 0.25  |  | 0.10     | 0.05  | 0.33  |
|          | FDR   | 0.66       | 0.16  | 1.00  |  | 0.46     | 0.11  | 1.00  |
| KD1      | ERR   | 0.34       | 0.15  | 0.52  |  | 0.40     | 0.21  | 0.63  |
| Observed | ODR   | 0.78       | 0.68  | 0.86  |  | 0.68     | 0.57  | 0.77  |

**Table S5-3. Z-curve analyses with papers in 2018 with first and last  $p$ -stats/ $p$ -values**

|          |       | $p$ -stats/ $p$ -values |       |       |          |       |       |
|----------|-------|-------------------------|-------|-------|----------|-------|-------|
|          | mean  | First                   |       |       | Last     |       |       |
| method   | power | estimate                | lower | upper | estimate | lower | upper |
| EM       | ERR   | 0.44                    | 0.22  | 0.62  | 0.21     | 0.05  | 0.39  |
|          | EDR   | 0.13                    | 0.05  | 0.57  | 0.07     | 0.05  | 0.24  |
|          | FDR   | 0.35                    | 0.04  | 1.00  | 0.73     | 0.17  | 1.00  |
| KD2      | ERR   | 0.50                    | 0.29  | 0.69  | 0.24     | 0.07  | 0.46  |
|          | EDR   | 0.17                    | 0.05  | 0.64  | 0.08     | 0.05  | 0.28  |
|          | FDR   | 0.25                    | 0.03  | 1.00  | 0.63     | 0.13  | 1.00  |
| KD1      | ERR   | 0.50                    | 0.28  | 0.71  | 0.25     | 0.07  | 0.48  |
| Observed | ODR   | 0.64                    | 0.52  | 0.74  | 0.56     | 0.44  | 0.67  |

**Table S5-4. Z-curve analyses with papers in 2018 with first and last  $p$ -stats**

| Table S5-4 | $p$ -stats |          |       |       |          |       |       |
|------------|------------|----------|-------|-------|----------|-------|-------|
|            | mean       | First    |       |       | Last     |       |       |
| 2018       | power      | estimate | lower | upper | estimate | lower | upper |
| EM         | ERR        | 0.49     | 0.27  | 0.68  | 0.26     | 0.07  | 0.50  |
|            | EDR        | 0.16     | 0.05  | 0.63  | 0.07     | 0.05  | 0.27  |
|            | FDR        | 0.27     | 0.03  | 1.00  | 0.69     | 0.14  | 1.00  |
| KD2        | ERR        | 0.57     | 0.32  | 0.77  | 0.32     | 0.09  | 0.55  |
|            | EDR        | 0.19     | 0.05  | 0.71  | 0.07     | 0.05  | 0.33  |
|            | FDR        | 0.22     | 0.02  | 1.00  | 0.68     | 0.11  | 1.00  |
| KD1        | ERR        | 0.58     | 0.33  | 0.77  | 0.32     | 0.09  | 0.60  |
| Observed   | ODR        | 0.64     | 0.51  | 0.75  | 0.51     | 0.38  | 0.63  |
